# Supplementary material for: Hypoinsulinaemic, hypoketotic hypoglycaemia due to mosaic genetic activation of PI3-kinase
Source: PubMed Central journal article supplement (PMC5488397; doi:10.1530/eje-17-0132), 2017-05-30
Supplement: eje-177-175-t001.pdf [file eje-177-175-t001.pdf]

**Supplementary Table S1 –*de novo* candidate genes in patient 1**

| <b>Gene</b>     | <b>Protein</b> | <b>Posterior probability</b> | <b>Genotype (P1/mother/father)</b> | <b>Chr</b> | <b>GRCh37</b> |
|-----------------|----------------|------------------------------|------------------------------------|------------|---------------|
| <i>DDB2</i>     | Thr246Met      | 1                            | CT/CC/CC                           | 11         | 47256342      |
| <i>ARHGAP12</i> | Gly127Val      | 1                            | AC/CC/CC                           | 10         | 32197404      |
| <i>PIK3CA</i>   | Gly726Lys      | 0.999992                     | AG/GG/GG                           | 3          | 178938934     |
| <i>ACSM5</i>    | Ala173Val      | 0.999901                     | CT/CC/CC                           | 16         | 20430652      |
| <i>NBPF9</i>    | Asn183Asp      | 0.995885                     | GG/GG/AA                           | 1          | 144815953     |
