# Supplementary material for: Hypoinsulinaemic, hypoketotic hypoglycaemia due to mosaic genetic activation of PI3-kinase
Source: PubMed Central journal article supplement (PMC5488397; doi:10.1530/eje-17-0132), 2017-05-30
Supplement: eje-177-175-t002.pdf [file eje-177-175-t002.pdf]

**Supplementary Table S2 – Panel of Genes Sequenced in P3**

|        |         |         |         |
|--------|---------|---------|---------|
| AKT1   | FLT3    | LAMTOR2 | PTEN    |
| AKT2   | GNA11   | MAP2K1  | PTPN11  |
| AKT3   | GNAQ    | MAPKAP1 | RHEB    |
| ALK    | GNAS    | MET     | RICTOR  |
| BRAF   | HRAS    | MLST8   | RPS6KB1 |
| CCND2  | IDH1    | mTOR    | RPS6KB2 |
| CDK2   | IDH2    | NRAS    | RPTOR   |
| DEPTOR | IGF1R   | PDGFRA  | RRAGA   |
| EGFR   | IGF2R   | PDK1    | RRAGB   |
| ERBB2  | JAK2    | PHLPP1  | RRAGC   |
| ERBB3  | JAK3    | PHLPP2  | RRAGD   |
| EZH2   | KDR     | PIK3CA  | SMAD4   |
| FGFR1  | KIT     | PIK3CB  | SOS1    |
| FGFR2  | KRAS    | PIK3R1  | SRC     |
| FGFR3  | LAMTOR1 | PIK3R2  | STAT3   |
