# Supplementary material for: Hypoinsulinaemic, hypoketotic hypoglycaemia due to mosaic genetic activation of PI3-kinase
Source: PubMed Central journal article supplement (PMC5488397; doi:10.1530/eje-17-0132), 2017-05-30
Supplement: eje-177-175-t003.pdf [file eje-177-175-t003.pdf]

**Supplementary Table S3 – Results of oral glucose tolerance testing in 13 patients with *PROS*.** Abbreviations used: CLOVES - Congenital lipomatous overgrowth with vascular, epidermal, and skeletal anomalies; FAH – Fibroadipose hyperplasia; KTS - Klippel-Trenaunay syndrome; MD – macrodactyly; MCAP – Macrocephaly and capillary malformation syndrome; ND – not determined

| Patient | Age (years) | Diagnosis | Glucose (mmol/l) |     |      |      | Insulin (pmol/l) |     |      |      |
|---------|-------------|-----------|------------------|-----|------|------|------------------|-----|------|------|
|         |             |           | 0'               | 30' | 60'  | 120' | 0'               | 30' | 60'  | 120' |
| P4      | 48          | CLOVES    | 4.0              | 6.2 | 5.4  | 4.4  | 26               | 252 | 228  | 117  |
| P7      | 37          | FAH       | 5.2              | 8.8 | 7.9  | 6.5  | 18               | 85  | 112  | 90   |
| P8      | 31          | FAH       | 4.9              | 7.5 | 6.0  | 6.2  | ND               | ND  | ND   | ND   |
| P9      | 34          | FAH       | 4.7              | 6.5 | 9.0  | 6.9  | 217              | 751 | 1851 | 1797 |
| P10     | 9           | FAH       | 4.8              | 6.9 | 8.3  | 6.3  | 42               | 122 | 207  | 113  |
| P12     | 34          | KTS       | 4.3              | 6.2 | 5.7  | 5.7  | 29               | 260 | 244  | 192  |
| P13     | 40          | MD        | 4.5              | 6.0 | 6.3  | 6.0  | 63               | 459 | 428  | 429  |
| P14     | 39          | MD        | 4.7              | 8.8 | 10.1 | 8.6  | 41               | 312 | 201  | 41   |
| P15     | 35          | MCAP      | 4.9              | 6.6 | 4.1  | 4.9  | 32               | 30  | 136  | 76   |
| P16     | 29          | MCAP      | 4.7              | 7.1 | 5.4  | 4.6  | 41               | 201 | 162  | 41   |
| P17     | 18          | MCAP      | 4.2              | 5.8 | 5.8  | 5.8  | ND               | 840 | 952  | 535  |
| P18     | 21          | MCAP      | 4.8              | 8.5 | 7.3  | 5.8  | 51               | 333 | 312  | 149  |
| P22     | 12          | MCAP      | 3.8              | 5.6 | 6.7  | ND   | <14              | 160 | 196  | ND   |
